# Supplementary material for: Identification and characterization of wheat stem rust resistance gene Sr21 effective against the Ug99 race group at high temperature
Source: PLOS journal article supplement (doi:10.1371/journal.pgen.1007287), 2018-04-03
Supplement: S6 (10.1371/journal.pgen.1007287.s006) [file journal.pgen.1007287.s006]

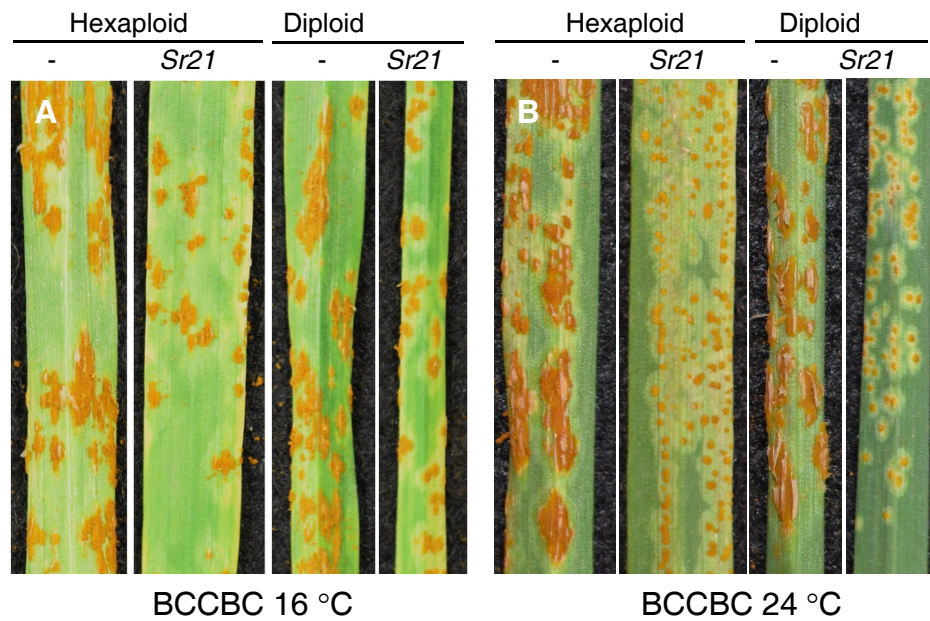

**S6 Fig. Interaction between temperature and sporulation area. (A-B)** Inoculation with *Pgt* race BCCBC at 16 °C (**A**) and 24 °C (**B**). The hexaploid susceptible line is Chinese Spring (CS, “-”) and the resistant line is CSSr21 (“*Sr21*”). The diploid susceptible line is *T. monococcum* PI 272557 (“-”) and the resistant line is G3116 (“*Sr21*”). Similar differences were observed before for *Sr21* resistance to TTKSK at 16 ° C and 20 °C [20].
