# Supplementary material for: Identification and characterization of wheat stem rust resistance gene Sr21 effective against the Ug99 race group at high temperature
Source: PLOS journal article supplement (doi:10.1371/journal.pgen.1007287), 2018-04-03
Supplement: S10 (10.1371/journal.pgen.1007287.s010) [file journal.pgen.1007287.s010]

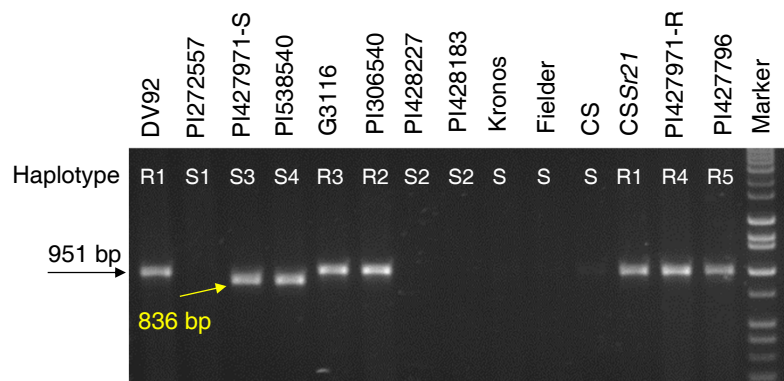

**S10 Fig. *Sr21* diagnostic PCR marker Sr21TRYF5R5 digested with *Nsi*I.** The undigested 951-bp PCR products (black arrow) are present in genotypes DV92 (R1), G3116 (R3), PI 306540 (R2), CSSr21 (R1), PI 427971-R (R4) and PI 427796 (R5) carrying the different *Sr21* resistant haplotypes. A digested band of 836-bp (yellow arrowhead, 115 bp band out of the gel) was detected in *T. monococcum* genotypes PI 427971-S and PI 538540 that carry the *Sr21* susceptible haplotypes S3 or S4. No amplification product was detected with these primers for susceptible genotypes of *T. monococcum* PI 272557 (S1), *T. urartu* PI 428227 (S2), PI 428183 (S2), and the related susceptible haplotypes present in Kronos, Fielder and Chinese Spring (CS) (S8 Fig. and S8 Table).
