# Supplementary material for: Identification and characterization of wheat stem rust resistance gene Sr21 effective against the Ug99 race group at high temperature
Source: PLOS journal article supplement (doi:10.1371/journal.pgen.1007287), 2018-04-03
Supplement: S12 (10.1371/journal.pgen.1007287.s012) [file journal.pgen.1007287.s012]

**S2 Table. Estimated copy number of transgenic insertions.** Number of insertions in each transgenic event based on T<sub>1</sub> plants and a TaqMan copy number assay of the transgenic plants relative to *CSSr2I* (1 copy).

|                                     |                                        | Transgenic family      |                        |                        |                        |                        |
|-------------------------------------|----------------------------------------|------------------------|------------------------|------------------------|------------------------|------------------------|
|                                     |                                        | T <sub>1</sub> Sr21-02 | T <sub>1</sub> Sr21-03 | T <sub>1</sub> Sr21-04 | T <sub>1</sub> Sr21-09 | T <sub>1</sub> Sr21-14 |
| <i>CNLI</i> DNA marker <sup>1</sup> | present                                | 49                     | 57                     | 56                     | 47                     | 44                     |
|                                     | absent                                 | 0                      | 0                      | 0                      | 1                      | 1                      |
| $\chi^2$ <i>P</i> value             | 1 copy                                 | <0.0001                | <0.0001                | <0.0001                | 0.0002                 | 0.0004                 |
|                                     | 2 copies                               | 0.0707                 | 0.0513                 | 0.0533                 | 0.233                  | 0.2643                 |
|                                     | 3 copies                               | 0.3778                 | 0.3415                 | 0.3458                 | <b>0.7711</b>          | <b>0.7212</b>          |
|                                     | 4 copies                               | <b>0.6611</b>          | 0.6364                 | 0.6393                 | 0.0601                 | 0.0489                 |
|                                     | 5 copies                               | <b>0.8268</b>          | <b>0.8134</b>          | 0.815                  | <0.0001                | <0.0001                |
|                                     | 6 copies                               | 0.9129                 | 0.9061                 | <b>0.9069</b>          | <0.0001                | <0.0001                |
| TaqMan                              | Transgene <sup>2</sup> / <i>CSSr2I</i> | 4.57                   | 4.98                   | 6.02                   | 3.03                   | 3.71                   |
| Copy No.                            | from genotype                          | 4 to 5                 | 5                      | 6                      | 3                      | 3                      |
|                                     | from phenotype                         | 2                      | 2                      | 2                      | 2                      | 1                      |
| Expression <sup>3</sup>             | T <sub>1</sub> / <i>CSSr2I</i>         | 2.55                   | 4.77                   | 5.72                   | 4.33                   | 2.97                   |

<sup>1</sup> Genotyped with markers S21CNLI1F5R5 (digested with *SphI*) and Sr21TRYF6-1R5 (Table S1). The estimated number integrates information from TaqMan and segregation data.

<sup>2</sup> Since T<sub>1</sub>s were segregating for copy number, we divided the average of the two highest copy number values in the progeny by *CSSr2I* average copy number.

<sup>3</sup> We divided the average of the two highest expression values in the progeny by *CSSr2I* expression value.
